# Supplementary material for: Study of chemical processes involved in silver staining of gold nanostructures by Raman scattering
Source: Royal Society of Chemistry journal article supplement (doi:10.1039/c6nr01208f), 2016-01-01
Supplement: c6nr01208f1.pdf [file c6nr01208f1.pdf]

**Supporting Information for**

**Study chemical processes involved in silver staining of gold  
nanostructures by Raman scattering**

*Xiaohui Ji, Wensheng Yang\**

*Contribution from the College of Chemistry, Jilin University, Changchun*

*130012, P. R. China*

*\*Corresponding authors: [wsyang@jlu.edu.cn](mailto:wsyang@jlu.edu.cn)*

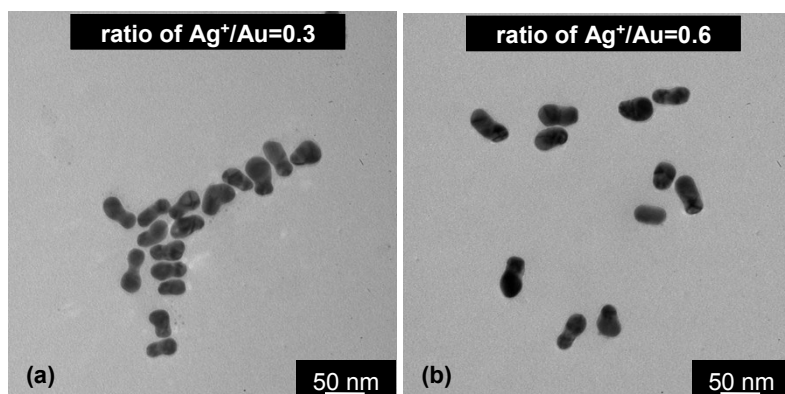

**Fig. S1.** TEM images of the gold dimers after the deposition of silver at the  $\text{Ag}^+/\text{Au}$  molar ratios ( $R_{\text{Ag}^+/\text{Au}}$ ) of 0.3 (left) and 0.6 (right).

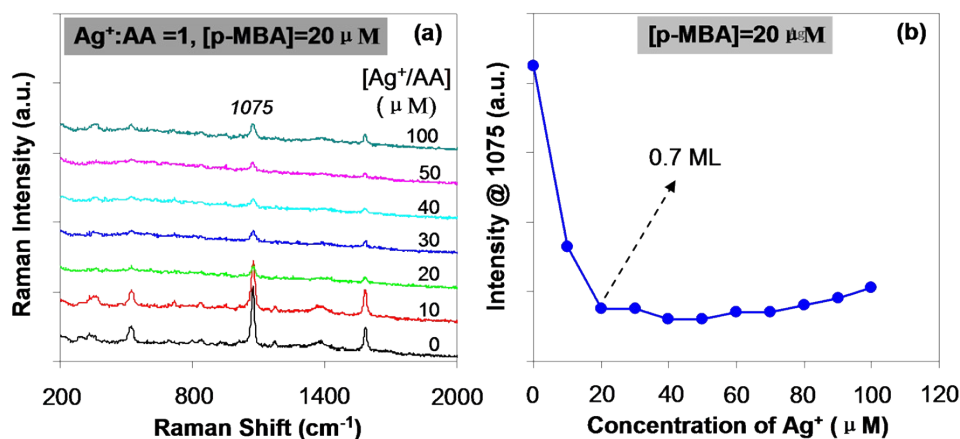

**Fig. S2.** (a) Raman spectra of *p*-MBA recorded with the silver-coated gold dimers prepared in the range of  $\text{Ag}^+$  concentrations of 0–100  $\mu\text{M}$ . (b) Variations in intensity of the peak at  $1075\text{ cm}^{-1}$  with the  $\text{Ag}^+$  concentration. The concentration of gold atoms in the dimer solutions was 127.0 mg/L as measured by ICP-AES. The  $R_{[\text{AA}]/[\text{Ag}^+]}$  ratio was kept in stoichiometry (1:1) in all the reactions. The decrease in intensity of the peak at  $1075\text{ cm}^{-1}$  at the  $\text{Ag}^+$  concentration of 20  $\mu\text{M}$ , corresponding to a silver shell thinner than one monolayer (equivalent to  $\sim 0.7$  monolayer (ML) by assuming the lattice parameter for both bulk Au and Ag as  $4.18\text{ \AA}$  (see Ref. 48 in the text).

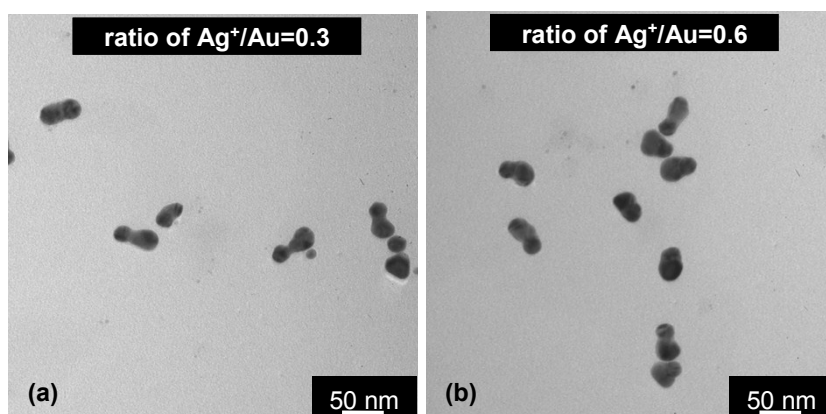

**Fig. S3.** TEM images of the bimetallic nanostructure with *p*-MBA sandwiched between the two metals with Ag<sup>+</sup>/Au molar ratios ( $R_{Ag^+/Au}$ ) of 0.3 (left) and 0.6 (right) related to Figure 6 in the text.
